# Supplementary material for: Lack of Association between Intact/Deletion Polymorphisms of the APOBEC3B Gene and HIV-1 Risk
Source: PubMed Central journal article supplement (PMC3965477; doi:10.1371/journal.pone.0092861), 2014-03-25
Supplement: pone.0092861.s002.pdf [file pone.0092861.s002.pdf]

A

Sample ID#

17  
82  
84  
180

Coverage depth (fold)

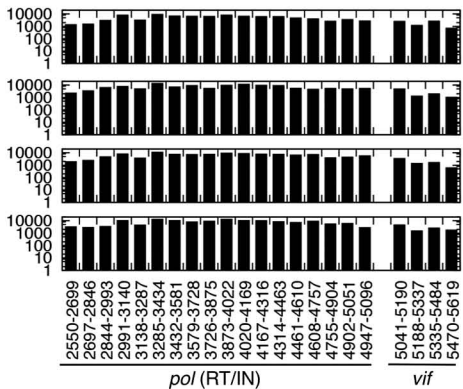

Sample ID#

8  
47  
73  
83

Coverage depth (fold)

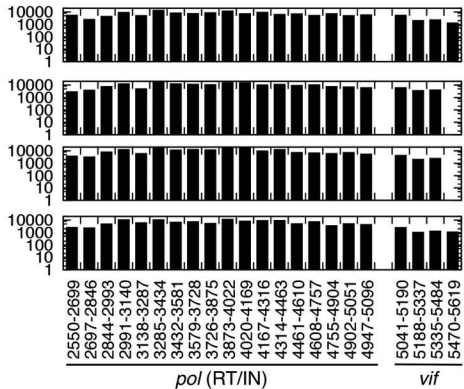

Sample ID#

15  
64  
117  
165

Coverage depth (fold)

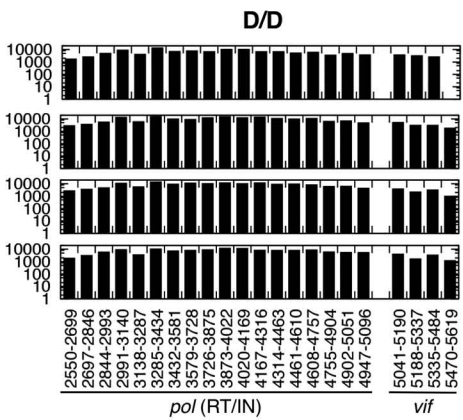

**B***pol*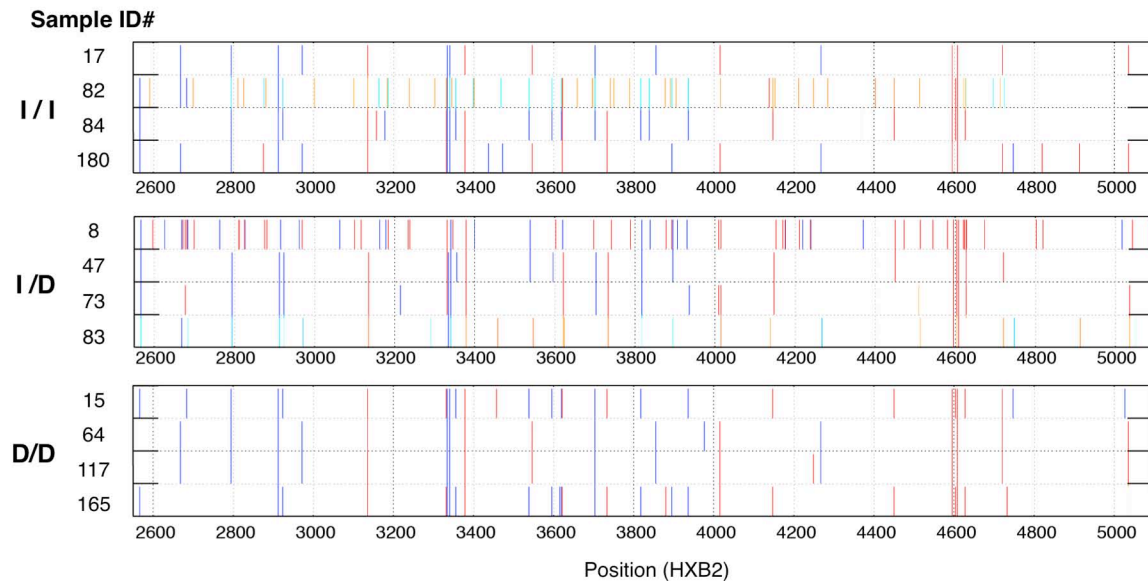*vif*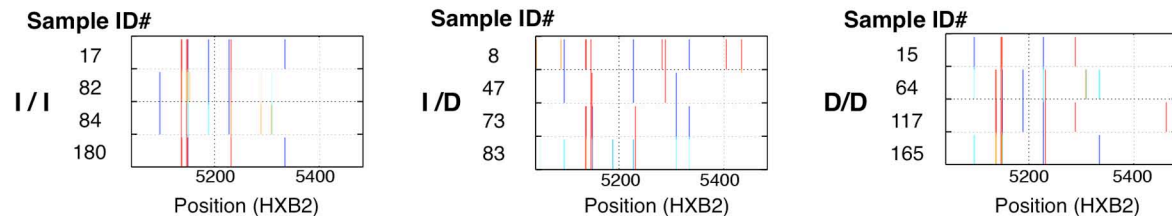

Frequency  
of hypermutations (%)

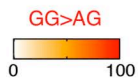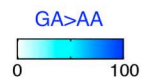

C

*pol*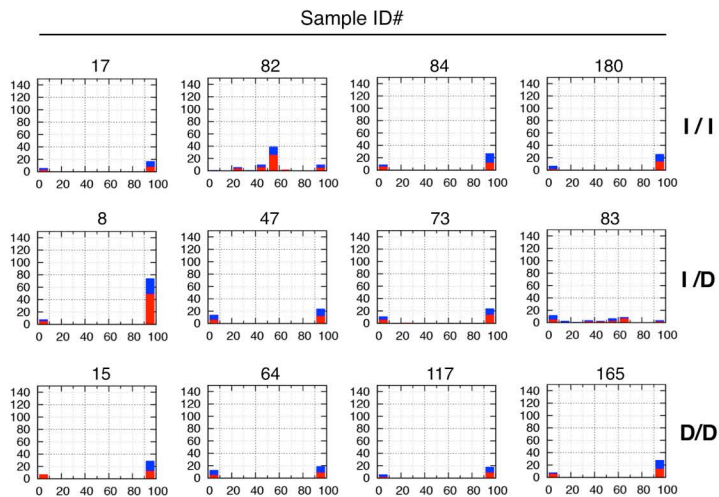*vif*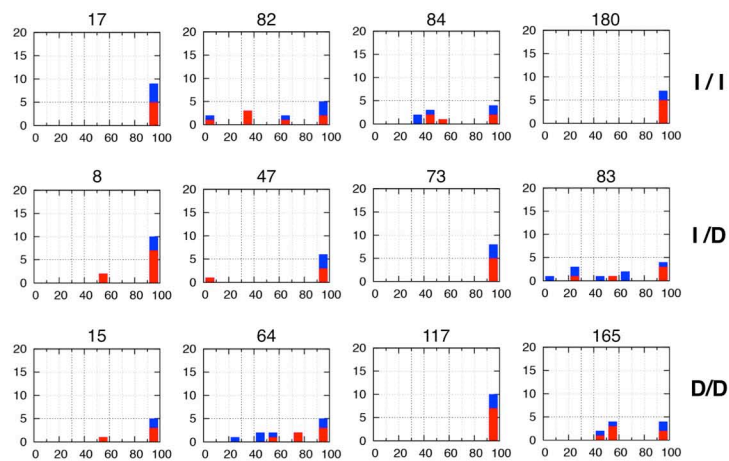
**GG>AG**
**GA>AA**
  
 Number of dinucleotide sequences


  
 Frequency of hypermutations (%)
